# Supplementary material for: Genomic Predictors of Asthma Phenotypes and Treatment Response
Source: Front Pediatr. 2019 Feb 5;7:6. doi: 10.3389/fped.2019.00006 (PMC6370703; doi:10.3389/fped.2019.00006)
Supplement: Supplementary file 1 [file Table_1.XLS]

## Sheet: TableS1
Table S1. Summary of the GWAS of asthma and related traits published between 2016 and 2018.
Type of study	Trait	Definition of asthma	Phenotype tested	Population	Age group	Sample size (cases/controls)	Genome-wide associations a	Reference
GWAS	Asthma susceptibility	Physician diagnosis	Asthma status	Asian	Adults	4,063 (720/3,343)	No b	[1]
		Self-reported	Asthma status	Caucasian	Children/adults	6,889 (3,041/3,848)	No b	[2]
		Physician diagnosis	Asthma status	Caucasian	Children	9,329 (4,061/5,268)	No b	[3]
		Physician diagnosis	Asthma status	Caucasian	Children/adults	13556	Yes	[4]
		Physician diagnosis/symptoms/use of medication	Asthma status	Caucasian (D)/African American (R)	Adults	10,995 (1,750/9,245)	Yes	[5]
		Physician diagnosis/symptoms	Asthma symptoms	Latino	Children	1246	No b	[6]
		Physician diagnosis/symptoms	Asthma status	Latino	Children/adults	5,037 (2144/2,893)	Yes	[7]
		Physician diagnosis/symptoms/use of medication	Asthma status	Mixed (African, Caucasian, Asian, Latino)	Children/adults	142,486 (23,948/118538)	Yes	[8]
	Asthma treatment response	Physician diagnosis/symptoms	Change in FEV1	Mixed (African American, Asian, Caucasian, Latino, Mixed)	Adults	2672	No b	[9]
		Physician diagnosis	Asthma exacerbations, eosinophil counts, IgE levels	Caucasian	Adults	1192	Yes	[10]
		Physician diagnosis/symptoms/use of medication	BDR	African American	Children	949	Yes	[11]
	Overlap among asthma and allergic diseases	Physician diagnosis/symptoms/use of medication	Asthma/allergic diseases status	Caucasian	Children/adults	360,838 (180,129/180,709)	Yes	[12]
		Physician diagnosis	Asthma/allergic diseases status	Caucasian	Children/adults	191,468 (57,245/134,223)	Yes	[13]
GWIS	Gene-environment interactions	Physician diagnosis	Asthma status	Caucasian	Adults	16,532 (1,690/14,842)	No	[14]
		Physician diagnosis	Asthma status	Caucasian	Children	3,136 (1,097/2,039)	No	[15]
a Association results with p≤5x10-8; b These results were not included in this review. BDR: bronchodilator response; D: discovery phase; FEV1: forced expiratory volume in 1 second; GWAS: genome-wide association study; GWIS: genome-wide interaction study; IgE: immunoglobin E; NA: not available; R: replication phase. 1. Yatagai Y, et al. J Allergy Clin Immunol; 2016, 138:281-3 e13. 2. Murk W, DeWan…
